# Supplementary material for: MtrA modulates Mycobacterium tuberculosis cell division in host microenvironments to mediate intrinsic resistance and drug tolerance
Source: PubMed Central journal article supplement (PMC10480492; doi:10.1016/j.celrep.2023.112875), 2023-08-04
Supplement: mmc1.pdf [file mmc1.pdf]

Cell Reports, Volume 42

## Supplemental information

### **MtrA modulates *Mycobacterium tuberculosis* cell division in host microenvironments to mediate intrinsic resistance and drug tolerance**

**Eliza J.R. Peterson, Aaron N. Brooks, David J. Reiss, Amardeep Kaur, Julie Do, Min Pan, Wei-Ju Wu, Robert Morrison, Vivek Srinivas, Warren Carter, Mario L. Arrieta-Ortiz, Rene A. Ruiz, Apoorva Bhatt, and Nitin S. Baliga**

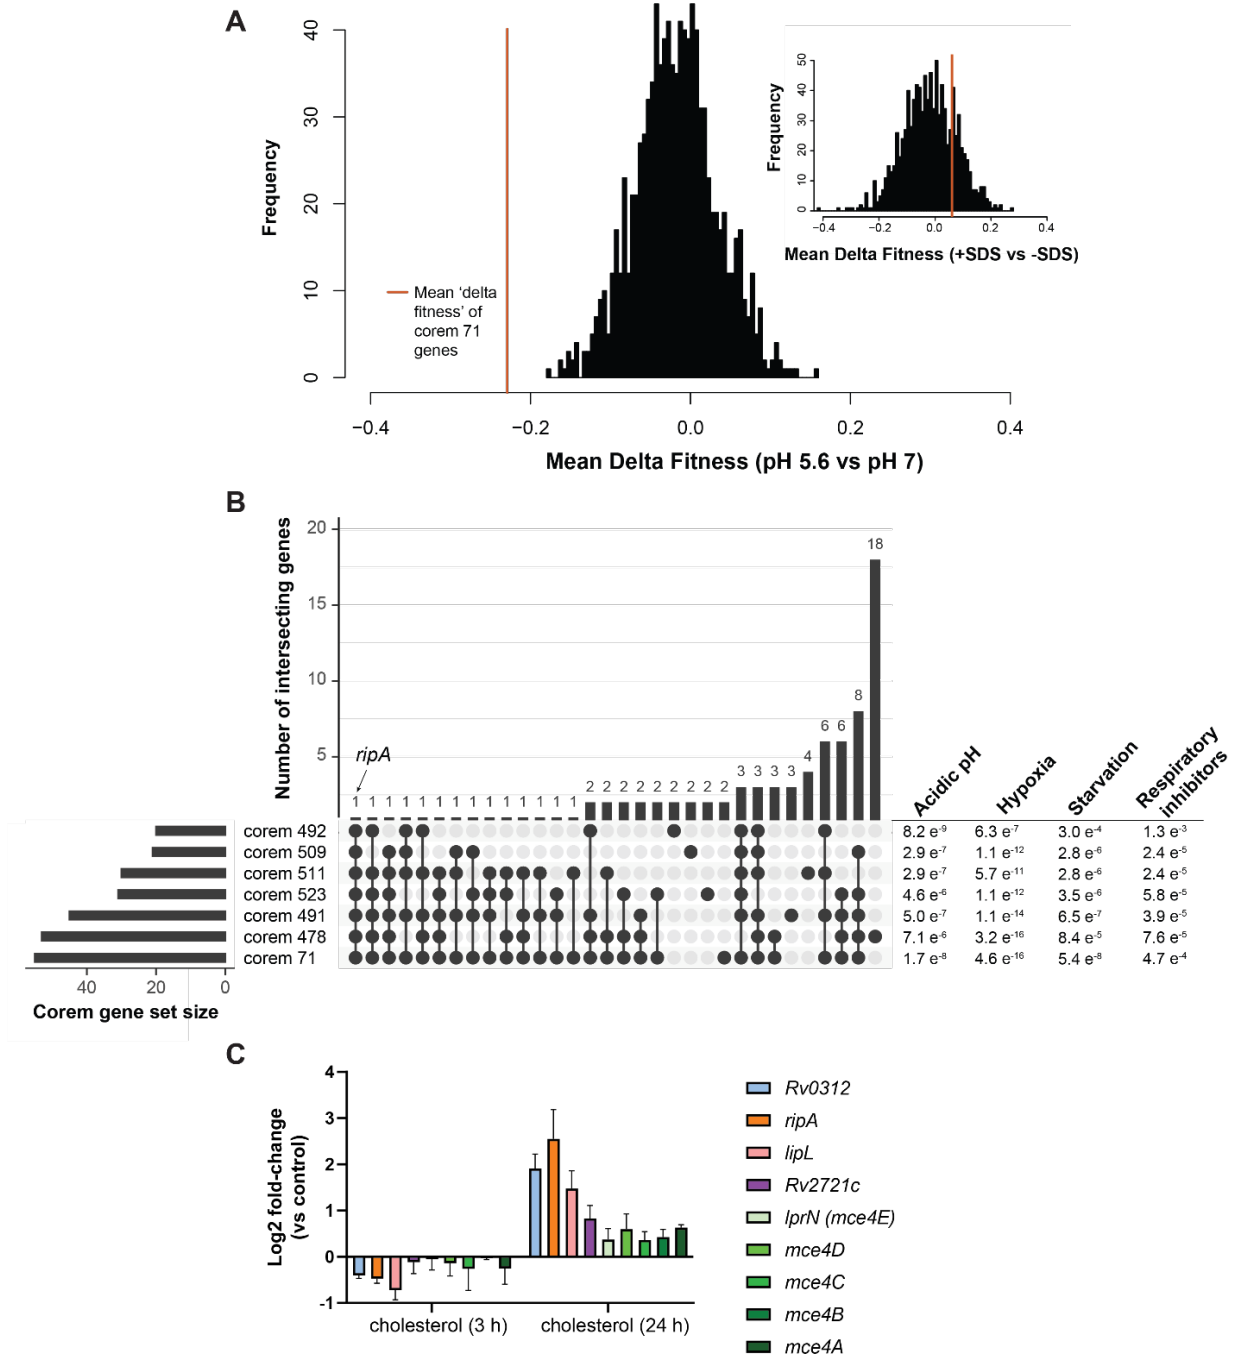

**Figure S1. Environmental influences of corem 71. Related to Figure 2. (A)** Histogram of mean delta fitness between acidic pH and neutral pH from 1000 permutations to generate shuffled gene sets. In each permutation, the produced shuffled gene set had the same size as corem 71. The orange line represents the observed value for corem 71. Inset displays the results of same analysis with mean delta fitness between the presence and absence of 0.05% SDS. **(B)** Upset plot of genes

in corems with similar environmental influences. Graph plots the number of genes in each corem and the intersection of genes within multiple corems. Each column corresponds to a single corem (single dot) or a set of corems (dots connected by lines below the X axis) containing the same genes. The number of genes in each set appears above the column, while the corems shared are indicated in the graphic below the column, with the corem numbers on the left. The enrichment (*P*-value) of environmental influences for each corem, calculated by hypergeometric test with BH correction is shown on the right. (C) Quantification (mean  $\pm$  s.d.,  $n = 3$  biological replicates) of corem 532 genes' mRNA levels by microarray. H37Rv cells were grown in the presence of cholesterol for indicated time and compared to control. Data is from Yang Liu and Gary Schoolnik's unpublished carbon sources data.

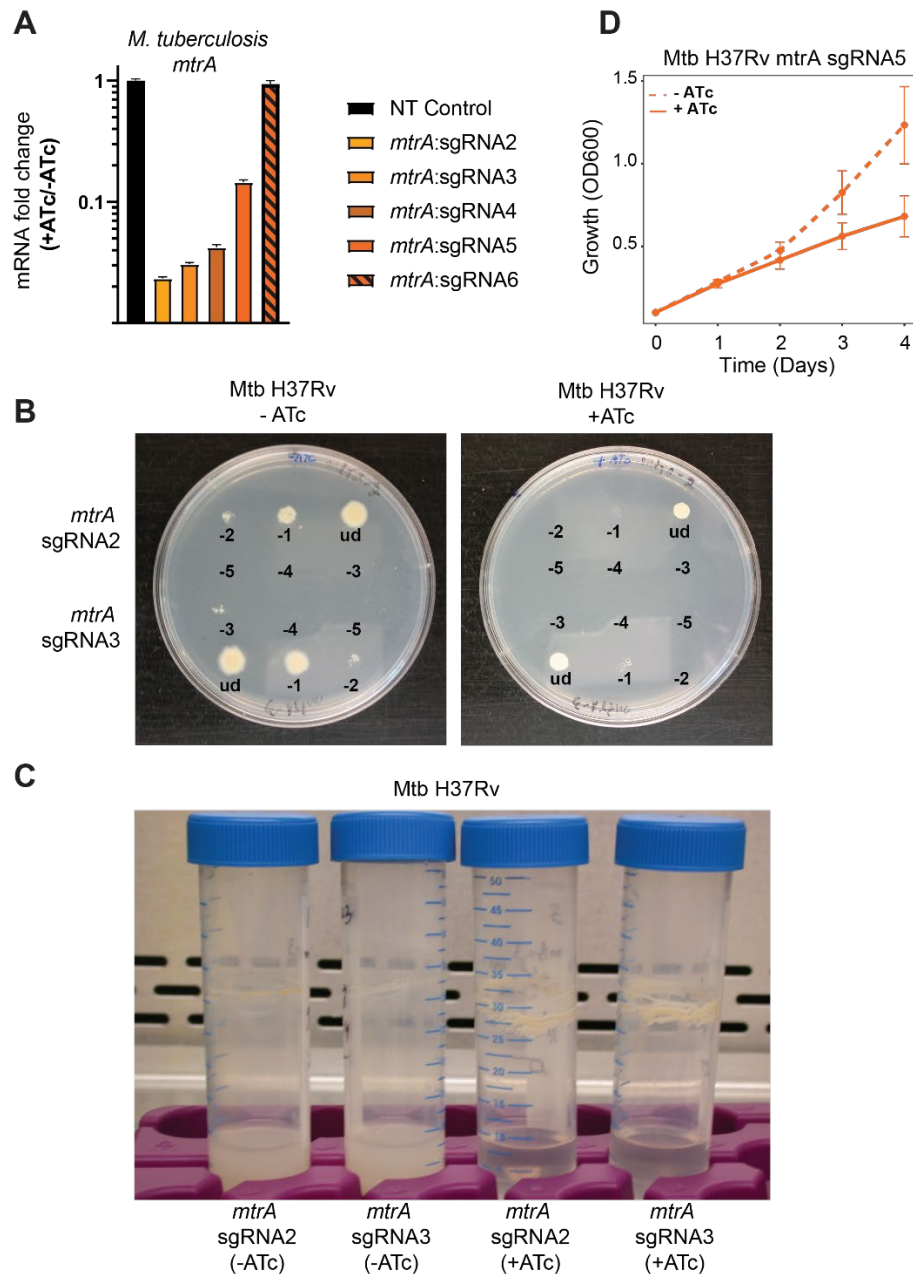

**Figure S2. CRISPRi knockdown of *mtrA* with PAMs of various “strengths” in *M. tuberculosis*. Related to Figure 2. (A)** Quantification (mean  $\pm$  SD,  $n = 3$  biological replicates) of *mtrA* mRNA levels by RT-qPCR. Strains were grown  $\pm$  ATc for 4 days before collecting RNA. **(B)** Serial 10-fold dilutions of *M. tuberculosis* H37Rv CRISPRi strains with sgRNA2 and sgRNA3 targeting *mtrA* were spotted on 7H10 agar plates with (+ATc) or without ATc (-ATc control). **(C)**

Photographs of liquid cultures of the indicated strains. **(D)** Growth of *M. tuberculosis* H37Rv CRISPRi strain with sgRNA5 in liquid 7H9-rich media with (solid line) or without (dotted line) ATc. Growth was monitored daily by optical density at 650 nm. Points are the average of three biological replicates and error bars represent standard deviation.

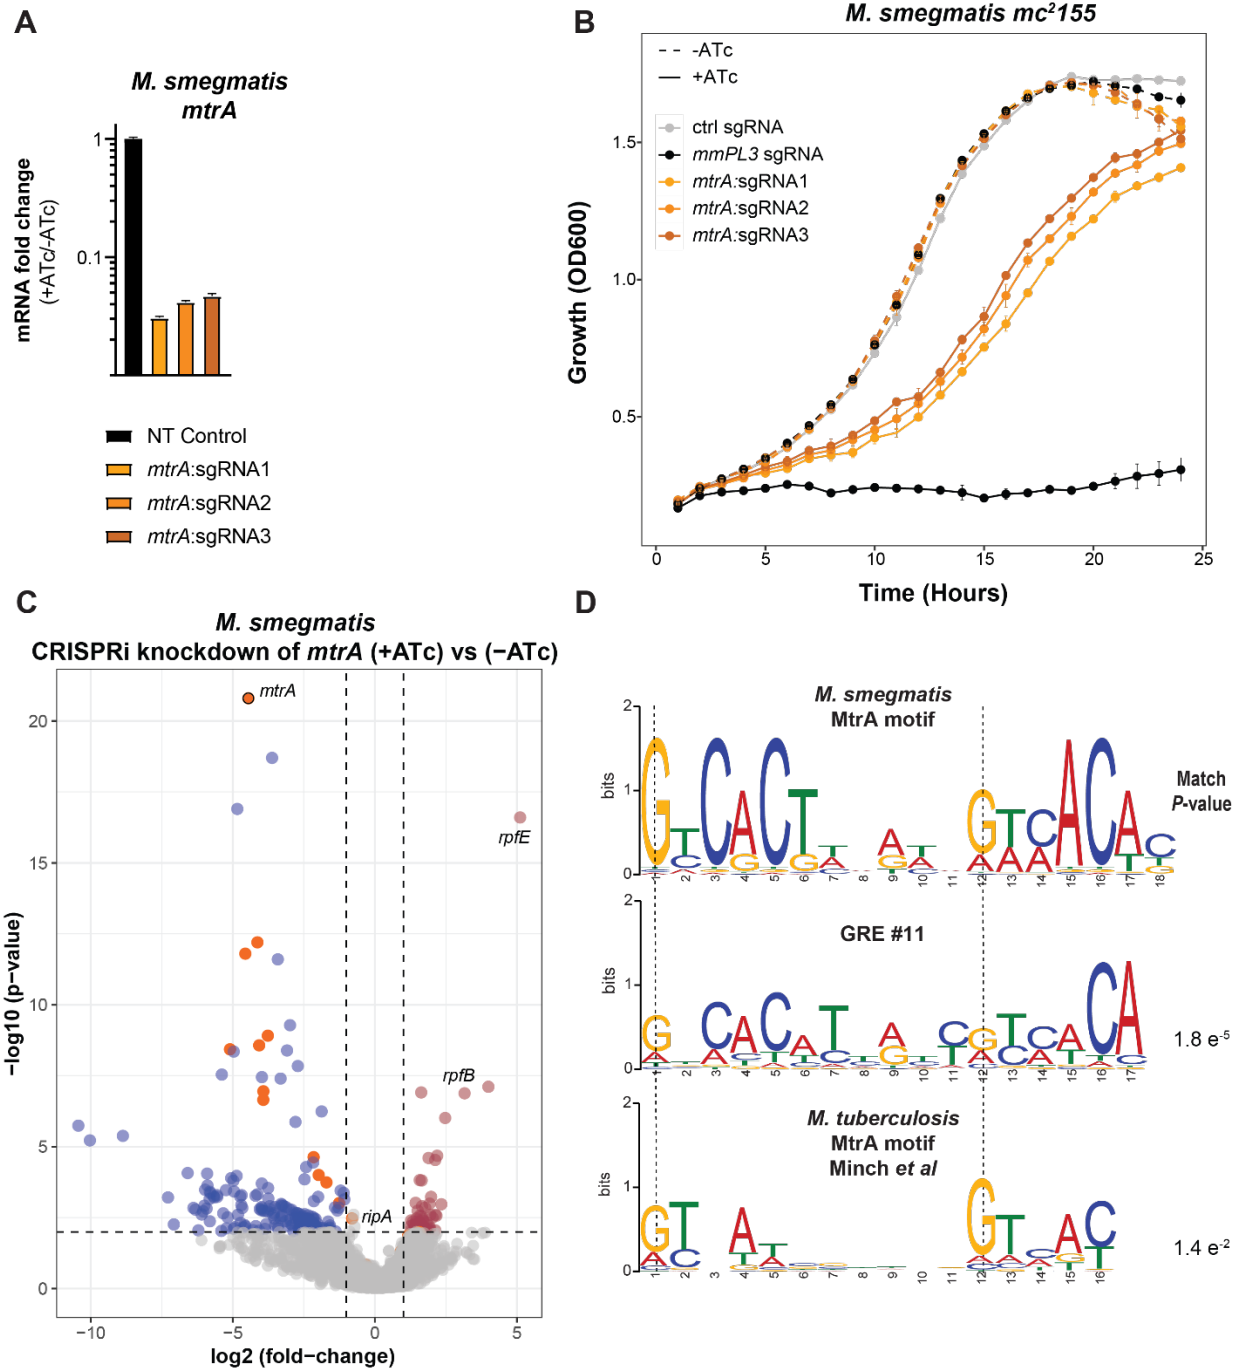

**Figure S3. CRISPRi knockdown of *mtrA* in *M. smegmatis*. Related to Figure 2. (A)** Quantification (mean  $\pm$  SD,  $n = 3$  biological replicates) of *mtrA* mRNA levels by RT-qPCR. Strains were grown  $\pm$  ATc overnight before collecting RNA. **(B)** Growth of *M. smegmatis* *mc*<sup>2</sup>155 CRISPRi strains with sgRNA1, sgRNA2, sgRNA3, control (ctrl) sgRNA, and sgRNA targeting

the essential gene *mmPL3* in liquid 7H9-rich media with (solid line) or without (dotted line) ATc. Growth was monitored hourly by optical density at 650 nm. Points are the average of three biological replicates and error bars represent standard deviation. **(C)** Volcano plot of differentially expressed genes for induced vs uninduced CRISPRi knockdown of *mtrA* in *M. smegmatis*. The significantly differentially expressed genes were selected by  $p$ -value  $< 0.01$  and absolute  $\log_2$  fold-change  $> 1$ . Dots represent different genes, with labels for particular genes of interest. Grey dots are genes without significant different expression, red dots are significantly up-regulated genes ( $N = 58$  genes) and blue dots are significantly down-regulated genes ( $N = 185$  genes). The orange dots are all genes of core 71. **(D)** MEME analysis was performed on the promoter regions of candidate genes found to be significantly downregulated upon *mtrA* knockdown in Msm ( $n = 17$  genes). The motif logo of MtrA from Msm compared to GRE #11 and MtrA motif deciphered through analysis of ChIP-seq mapped binding locations in Mtb [S1]. The  $P$ -values from alignment carried out with Tomtom [S2] are shown.

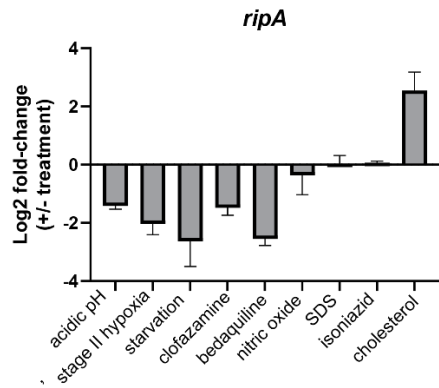

| Condition        | Description                                                       | Reference                                                     |
|------------------|-------------------------------------------------------------------|---------------------------------------------------------------|
| acidic pH        | pH 5.6 vs pH 7.0                                                  | This study                                                    |
| stage II hypoxia | 0% dissolved oxygen, after 2 day slow/controlled oxygen depletion | PMID: 32348771                                                |
| starvation       | 2 weeks in PBS-tyloxapol vs log growth                            | Baliga lab unpublished data                                   |
| clofazimine      | 0.6 µg/mL clofazimine treated for 24 h vs untreated               | GEO: GSE165673                                                |
| bedaquiline      | 3.5 µg/mL bedaquiline treated for 24 h vs untreated               | GEO: GSE165673                                                |
| nitric oxide     | 1 mM DETA/nitric oxide for 24 h vs log growth                     | PMID: 28811595                                                |
| SDS              | 0.05% SDS treated for 24 h vs untreated                           | Baliga lab unpublished data                                   |
| isoniazid        | 1.8 µg/mL isoniazid treated for 24 h vs untreated                 | GEO: GSE165673                                                |
| cholesterol      | 1 mg/mL cholesterol for 24 vs control                             | Yang Liu and Gary Schoolnik's unpublished carbon sources data |

**Figure S4. Conditional expression of MtrA regulatory target, *ripA*.** Related to Figure 2. The expression of *ripA* in conditions significantly enriched in corem 71 —acidic pH, hypoxia, starvation and treatment with respiratory inhibitors (*e.g.*, clofazimine and bedaquiline). Other conditions not enriched in corem 71 (*e.g.*, nitric oxide, SDS, and isoniazid treatment) are included for comparison. RipA is also found in corem 532 that is enriched in growth on cholesterol. Details of experimental conditions and data source are given in the table to the right.



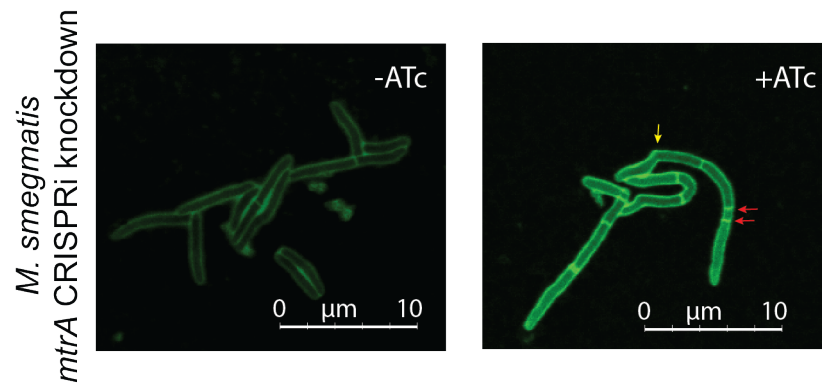

**Figure S5. MtrA controls cell division in *M. smegmatis*. Related to Figure 4.** Example micrographs of uninduced (-ATc) and induced (+ATc) CRISPRi knockdown of *mtrA* with sgRNA1 in Msm. After knockdown, cells were labeled with HCC-amino-D-alanine (HADA) for 3.5 h. Red arrows indicate multiple septa and yellow arrow indicates the curved shape phenotype. Data are representative of at least two independent experiments.

**A**

**Vancomycin**  
**Rifampicin**  
**Bedaquiline**  
**TBAJ-587**  
**Compound 2**  
**Clofazamine**  
**Pretomanid**  
**Moxifloxacin**  
**Compound 6**  
**Isoniazid**  
**Cycloserine**

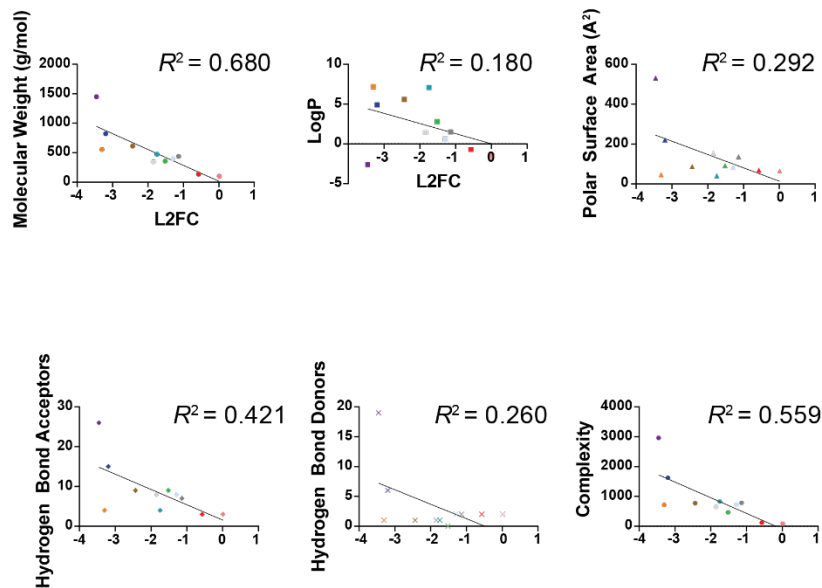

**B**

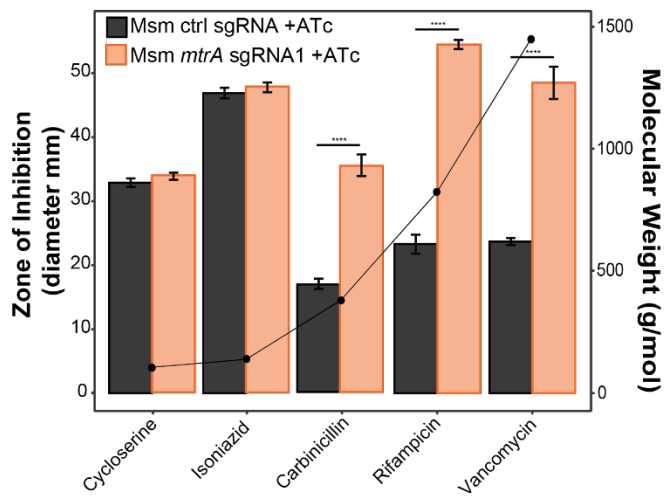

**C**

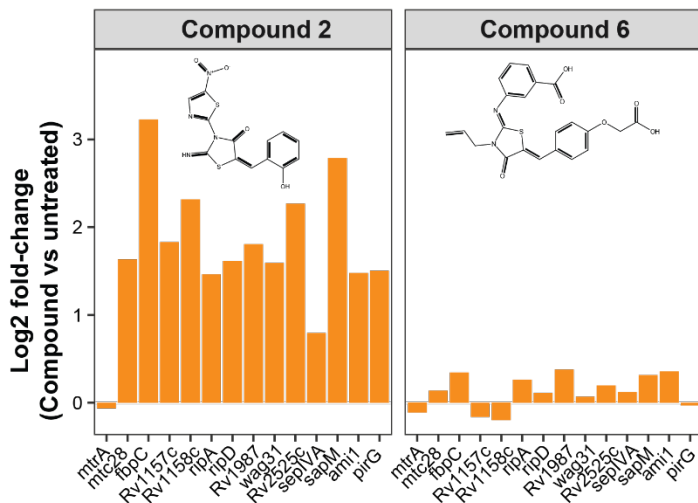

**Figure S6. Antibiotic activity with *mtrA* knockdown. Related to Figure 5.** (A) For each drug, the Log<sub>2</sub> fold-change (L2FC) in IC<sub>50</sub> for *mtrA* knockdown in Mtb compared to control (NT sgRNA) was compared to various physiochemical properties. The IC<sub>50</sub> measurements were calculated using a nonlinear fit and the  $R^2$  values were determined using linear regression in GraphPad Prism. (B) The induced CRISPRi *mtrA* knockdown with sgRNA1 and control (ctrl) sgRNA strains of Msm were spread on LB plates containing 100 ng/ml ATc inducer in triplicate. A filter disc with 10  $\mu$ l antibiotic was placed in the center of plate and the diameter of inhibition of growth was measured after 4 days of growth. Antibiotic concentration on disc: cycloserine (100 mg/ml); isoniazid (0.5 mg/ml); carbinicillin (100 mg/ml); rifampicin (0.5 mg/ml); vancomycin (6 mg/ml). Significance was determined by Student's T-test. \*\*\*\*:  $p$ -value < 0.0001. Results are mean from technical triplicates. All data are representative of at least two independent experiments. (C) Mtb H37Rv was treated with 34  $\mu$ g/mL of Compound 2 or 80  $\mu$ g/mL of Compound 6 for 72 h. Cell pellets were collected for RNA extraction and mRNA was quantitated by RNA-seq.

**Table S1. sgRNAs used in this study.**

| <b>Organism</b>        | <b>Gene</b>  | <b>sgRNA name</b> | <b>Forward</b>              | <b>Reverse</b>               | <b>PAM (5'-3')</b> |
|------------------------|--------------|-------------------|-----------------------------|------------------------------|--------------------|
| <i>M. smegmatis</i>    | <i>mtrA</i>  | sgRNA1            | GGGAGGTGTCGAAACCTCACCAC     | AAACGTGGTGAGGGTTTCGACACC     | AGAAC              |
| <i>M. smegmatis</i>    | <i>mtrA</i>  | sgRNA2            | GGGAATCGATGCCGTTTCATCCCAG   | AAACCTGGGATGAACGGCATCGAT     | AGCAT              |
| <i>M. smegmatis</i>    | <i>mtrA</i>  | sgRNA3            | GGGAGACGGTGTGGTCTTGCGCG     | AAACCCGCAAGACCGACACCGTC      | AGCAT              |
| <i>M. smegmatis</i>    | NT           | control_sgRNA     | GGGAGGAGACGATTAATGCGTCTCG   | AAACCGAGACGCATTAATCGTCTCC    | AGAAA              |
| <i>M. smegmatis</i>    | <i>mmpL3</i> | mmpL3             | GGGAGCGACAGACTGGCTGCCCTCGTC | AAACGACGAGGGCAGCCAGTCTGTGCGC | AGAAA              |
| <i>M. tuberculosis</i> | <i>mtrA</i>  | sgRNA2            | GGGAATCCACGGTGTGGTCTTTGCGG  | AAACCCGCAAAGACCGACACCGTGGAT  | AGCAT              |
| <i>M. tuberculosis</i> | <i>mtrA</i>  | sgRNA3            | GGGAGATTCTACGTCGGCGATGG     | AAACCCATCGCCGACGTAGAAATC     | AGCAT              |
| <i>M. tuberculosis</i> | <i>mtrA</i>  | sgRNA4            | GGGAGTCTTTGCGGTGAGCATCACGA  | AAACTCGTGATGCTCACCGCAAAGAC   | GGAAC              |
| <i>M. tuberculosis</i> | <i>mtrA</i>  | sgRNA5            | GGGAGCCGGTAACCCATACCTGTT    | AAACAACAGGTATGGGGTTACCGGC    | AGCAG              |
| <i>M. tuberculosis</i> | <i>mtrA</i>  | sgRNA6            | GGGAGTCAGCACCACAGTCGGGTTTC  | AAACGAACCCGACTGTGGTGCTGAC    | GGGAT              |
| <i>M. tuberculosis</i> | NT           | control_sgRNA     | GGGAGGAGACGATTAATGCGTCTCG   | AAACCGAGACGCATTAATCGTCTCC    | AGAAA              |

**Table S2.** Genes with predicted regulation by MtrA.

| Gene           | Name              | Description                                 | Gene with reduced fitness at acidic pH | Gene with GRE #11 in promoter | Mtb <i>mtrA</i> knockdown +Atc vs -Atc Log2 FC (p <0.01) | Mtb <i>mtrA</i> knockdown Li et al Log2 FC (p <0.01) | Msm homolog              | Msm <i>mtrA</i> knockdown +Atc vs -Atc Log2 FC (p <0.05) |
|----------------|-------------------|---------------------------------------------|----------------------------------------|-------------------------------|----------------------------------------------------------|------------------------------------------------------|--------------------------|----------------------------------------------------------|
| <i>Rv3246c</i> | <i>mtrA</i>       | essential response regulator                |                                        |                               | -3.76                                                    | -1.21                                                | <i>MSMEG_1874</i>        | -4.56                                                    |
| <i>Rv0040c</i> | <i>mtc28</i>      | secreted protein                            | X                                      | X                             | -2.99                                                    | -3.58                                                | <b><i>MSMEG_6919</i></b> | <b>-4.13</b>                                             |
| <i>Rv0129c</i> | <i>ag85C/fbpC</i> | cell wall trehalose dimycolate biosynthesis | X                                      | X                             | -1.59                                                    | -2.6                                                 | <b><i>MSMEG_3580</i></b> | <b>-3.77</b>                                             |
| <i>Rv0179c</i> | <i>lprO</i>       | lipoprotein                                 |                                        | X                             | -1.08                                                    | -1.5                                                 | <b><i>MSMEG_0210</i></b> | <b>-1.7</b>                                              |
| <i>Rv0312</i>  |                   | proline and threonine rich                  |                                        | X                             | -2.68                                                    | -4.66                                                | <i>MSMEG_0638</i>        | ns                                                       |
| <i>Rv1157c</i> |                   | conserved protein                           |                                        | X                             | -1.24                                                    | -0.85                                                | <b><i>MSMEG_5153</i></b> | <b>-4.45</b>                                             |
| <i>Rv1158c</i> |                   | conserved protein                           | X                                      | X                             | -1.9                                                     | -2.71                                                | <b><i>MSMEG_5151</i></b> | <b>-5.1</b>                                              |
| <i>Rv1435c</i> |                   | proline, valine, glycine rich secreted      |                                        | X                             | -2.85                                                    | -2.24                                                | <i>MSMEG_0673</i>        | -3.93                                                    |
| <i>Rv1477</i>  | <i>ripA</i>       | peptidoglycan endopeptidase                 | X                                      | X                             | -2.4                                                     | -1.81                                                | <b><i>MSMEG_3145</i></b> | <b>-0.80</b>                                             |
| <i>Rv1566c</i> | <i>ripD</i>       | peptidoglycan endopeptidase                 |                                        | X                             | -2.54                                                    | -2.17                                                | <i>MSMEG_3477</i>        | -3.1                                                     |
| <i>Rv1690</i>  | <i>lprJ</i>       | lipoprotein                                 |                                        | X                             | -1.72                                                    | -2.55                                                | <b><i>MSMEG_4689</i></b> | <b>-4.07</b>                                             |
| <i>Rv1987</i>  |                   | probable chitinase                          |                                        | X                             | -3.3                                                     | -2.21                                                |                          |                                                          |
| <i>Rv2145c</i> | <i>wag31</i>      | essential cell elongation protein DivIVA    |                                        | X                             | -1.2                                                     | -0.66                                                | <i>MSMEG_4217</i>        | ns                                                       |
| <i>Rv2525c</i> |                   | peptidoglycan glycoside hydrolase           |                                        | X                             | -1.07                                                    | -0.69                                                | <i>MSMEG_6815</i>        | ns                                                       |
| <i>Rv2894c</i> | <i>xerC</i>       | tyrosine recombinase                        |                                        | X                             | -2.26                                                    | -1.68                                                | <b><i>MSMEG_2515</i></b> | <b>-1.26</b>                                             |
| <i>Rv2927c</i> | <i>sepIVA</i>     | essential cell septation protein            |                                        | X                             | -1.2                                                     | ns                                                   | <b><i>MSMEG_2416</i></b> | <b>1.11</b>                                              |
| <i>Rv3310</i>  | <i>sapM</i>       | acid phosphatase                            | X                                      | X                             | ns                                                       | -1.24                                                |                          |                                                          |
| <i>Rv3717</i>  | <i>ami1</i>       | peptidoglycan amidase                       | X                                      | X                             | -1.75                                                    | -1.46                                                | <b><i>MSMEG_6281</i></b> | <b>-3.92</b>                                             |
| <i>Rv3810</i>  | <i>pirG/erp</i>   | exported repetitive protein                 | X                                      | X                             | -3.0                                                     | -1.67                                                | <b><i>MSMEG_6405</i></b> | <b>-1.98</b>                                             |
| <i>Rv1075c</i> |                   | conserved exported protein                  |                                        |                               | -1.82                                                    | -1.53                                                | <i>MSMEG_5272</i>        | ns                                                       |
| <i>Rv1076</i>  | <i>lipU</i>       | lipase                                      |                                        |                               | -4.91                                                    | -3.11                                                | <i>MSMEG_5271</i>        | ns                                                       |
| <i>Rv1469</i>  | <i>ctpD</i>       | cation transporter P-type ATPase            |                                        | *                             | -2.00                                                    | -1.51                                                | <i>MSMEG_5403</i>        | -1.55                                                    |
| <i>Rv1478</i>  | <i>ripB</i>       | peptidoglycan endopeptidase                 | X                                      |                               | -3.13                                                    | -2.37                                                | <i>MSMEG_3146</i>        | -1.20                                                    |
| <i>Rv1754c</i> |                   | conserved protein                           |                                        |                               | -2.92                                                    | -1.78                                                | <i>MSMEG_2107</i>        | -3.62                                                    |
| <i>Rv3229c</i> | <i>desA3</i>      | stearoyl-CoA 9-desaturase                   |                                        |                               | -1.03                                                    | -1.34                                                | <i>MSMEG_1886</i>        | -0.93                                                    |

Msm homologs in bold have significant MtrA binding site in their promoter. Genes shaded in grey are not part of core71.

### **Supplemental Information References**

- S1 Minch, K.J., Rustad, T.R., Peterson, E.J., Winkler, J., Reiss, D.J., Ma, S., Hickey, M., Brabant, W., Morrison, B., Turkarslan, S., et al. (2015). The DNA-binding network of *Mycobacterium tuberculosis*. *Nat Commun* 6, 5829. 10.1038/ncomms6829.
- S2 Gupta, S., Stamatoyannopoulos, J.A., Bailey, T.L., and Noble, W.S. (2007). Quantifying similarity between motifs. *Genome Biol* 8, R24. 10.1186/gb-2007-8-2-r24.
